# Supplementary material
Source: Royal Society of Chemistry journal article supplement (doi:10.1039/d6dt00734a)
Supplement: d6dt00734a1.pdf [file d6dt00734a1.pdf]

## Supporting Information

# Ligand-Induced Morphological Engineering and Electronic Modulation of CoCu Bimetallic Catalysts for Efficient HMF Electrooxidation

Hua Yu<sup>a</sup>, Li Xu<sup>a</sup>, Guizhen Li<sup>b</sup>, Wei Xu<sup>b</sup>, Yuxin Wang<sup>a</sup>, Wen Zhang<sup>\*a</sup>

[a] State Key Laboratory of Chemical Engineering and Low-Carbon Technology, Tianjin Key Laboratory of Membrane Science & Desalination Technology, and School of Chemical Engineering and Technology, Tianjin University, Tianjin 300350, China

[b] Tianjin Mainland Hydrogen Equipment Co., Ltd., Tianjin, 301609, China

\*Corresponding author E-mail: zhang\_wen@tju.edu.cn

## 1 Chemicals and materials

Cobalt(II) nitrate hexahydrate ( $\text{Co}(\text{NO}_3)_2 \cdot 6\text{H}_2\text{O}$ , 99%) and copper(II) nitrate trihydrate ( $\text{Cu}(\text{NO}_3)_2 \cdot 3\text{H}_2\text{O}$ , 99%) ammonium formate (chromatography grade,  $\geq 99.9\%$ ), and formic acid (HPLC grade) were purchased from Shanghai Aladdin Reagent Co., Ltd. Potassium hydroxide (KOH, GR grade, 85%) and methanol (HPLC grade, 99%) were purchased from Tianjin Kemiou Reagent Co., Ltd. 2,6-naphthalenedicarboxylic acid (2,6-NDA, 98%) were purchased from Tianjin Heowns Biochemical Technology Co., Ltd. Potassium 2,6-naphthalenedicarboxylate (2,6- $\text{K}_2\text{NDA}$ , 97%) were purchased from Shanghai Bide Pharmaceutical Technology Co., Ltd. 5-Hydroxymethylfurfural (HMF, 97%) and 2,5-furandicarboxylic acid (FDCA, 99.5%) were purchased from Adamas Limited. 5-Hydroxymethylfurfural carboxylic acid (HMFCA, 98%) and 5-Formyl-2-furancarboxylic acid (FFCA, 99.9%) were purchased from Alpha Aesar. 2,5-diformylfuran (DFF, 98%) were purchased from Shanghai Aladdin Reagent Co., Ltd. Anhydrous ethanol was purchased from Tianjin Aopusheng Chemical Co., Ltd. The resistivity of ultrapure water was  $18.25 \text{ M}\Omega \cdot \text{cm}$ . All chemical reagents were used directly without further purification. Additionally, Nickle foam (NF) used in the experiments was procured from Tianjin Liweitan Technology Co., Ltd.

## 2 Characterization

The crystal structure was characterized using X-ray diffraction (XRD, Bruker D8-Focus, Cu-K $\alpha$  radiation at 40 kV,  $\lambda=1.5418$  Å) with a scan range of 5°-70° and a scan rate of 5° min<sup>-1</sup>. Fourier transform infrared (FT-IR) spectra were recorded on a Gangdong FTS-650 spectrometer to investigate the coordination structure of the catalysts. The samples were prepared using the KBr pellet method under a pressure of 10 MPa for 60 seconds. The spectra were collected with 32 scans at a resolution of 4 cm<sup>-1</sup>. Electrode samples were tested using a confocal Raman spectrometer (HORIBA LabRAM HR Evolution, excitation wavelength: 532 nm, acquisition time: 10 s). Morphological observation of the prepared samples was performed using a scanning electron microscope (SEM, Hitachi 8100, Japan). Transmission electron microscopy (TEM) and high-resolution TEM images were obtained using a transmission electron microscope (JEOL JEM-2100F, Japan) equipped with an energy-dispersive spectrometer (EDS). Electrode samples were analyzed using an X-ray photoelectron spectrometer (Thermo Scientific ESCALAB 250XI, X-ray source: Al K $\alpha$  (energy 1486.68 eV), acceleration voltage 15 kV). Notably, the vacuum level in the analysis chamber was maintained at  $<10 \times 10^{-8}$  mbar. XPS data peak fitting was performed using XPSPEAK41 software.

## 3 Product quantification

The concentration of organic compounds was determined using high-performance liquid chromatography (HPLC, LC-20AD, Shimadzu) equipped with a UV-visible detector set at 265 nm and a C18 column. Mobile phase A: 1045 g DI water + 1.76 g ammonium formate + 1 mL formic acid + 43.5 g methanol, flow rate 0.425 mL min<sup>-1</sup>; Mobile phase: Phase B: methanol, flow rate 0.075 mL min<sup>-1</sup>. Column temperature was set at 60°C. For each analysis, 100  $\mu$ L of anodic electrolyte was diluted to 3 mL with 0.2 mol/L sulfuric acid. Subsequently, 1 mL of this mixture was taken and combined with 350  $\mu$ L 1 mol/L KOH + 650  $\mu$ L DI water. Each run lasted 20 minutes. Product quantification was performed using the external standard method. The conversion rate of HMF (Conv.<sub>HMF</sub>), the yield of FDCA (Yield<sub>FDCA</sub>), and the Faraday efficiency (FE) were calculated according to the following equations:

$$\text{Conversion (\%)} = \frac{\text{mole of consumed HMF}}{\text{mole of initial HMF}} \times 100\%$$

$$\text{Yield (\%)} = \frac{\text{mole of formed FDCA}}{\text{mole of consumed HMF}} \times 100\%$$

$$\text{Faradaic efficiency (\%)} = \frac{\text{mole of formed FDCA}}{Q} \times 6 \times F \times 100\%$$

$Q$  is the charge transferred over the reaction, and  $F$  is the Faraday constant (96485 C mol<sup>-1</sup>).

The carbon balance was calculated according to the following equation:

$$\text{Carbon balance (\%)} = \frac{n_{HMF} + n_{HMFC} + n_{DF} + n_{FFCA} + n_{FDCA}}{\text{mole of initial HMF}} \times 100\%$$

where  $n$  represents the mole of each species.

#### 4 Supplementary figures and tables

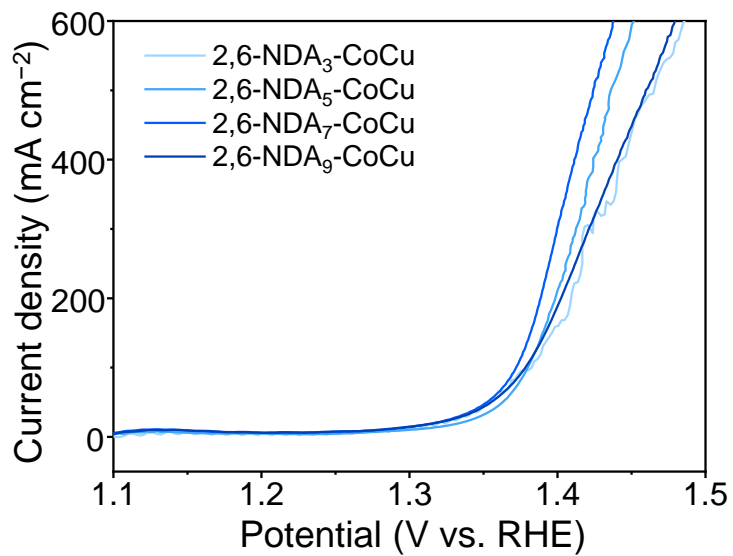

**Fig. S1** The 2,6-NDA<sub>x</sub>-CoCu catalyst synthesized by electrodeposition with varying molar ratios of 2,6-NDA ( $x=3,5,7,9$ ).

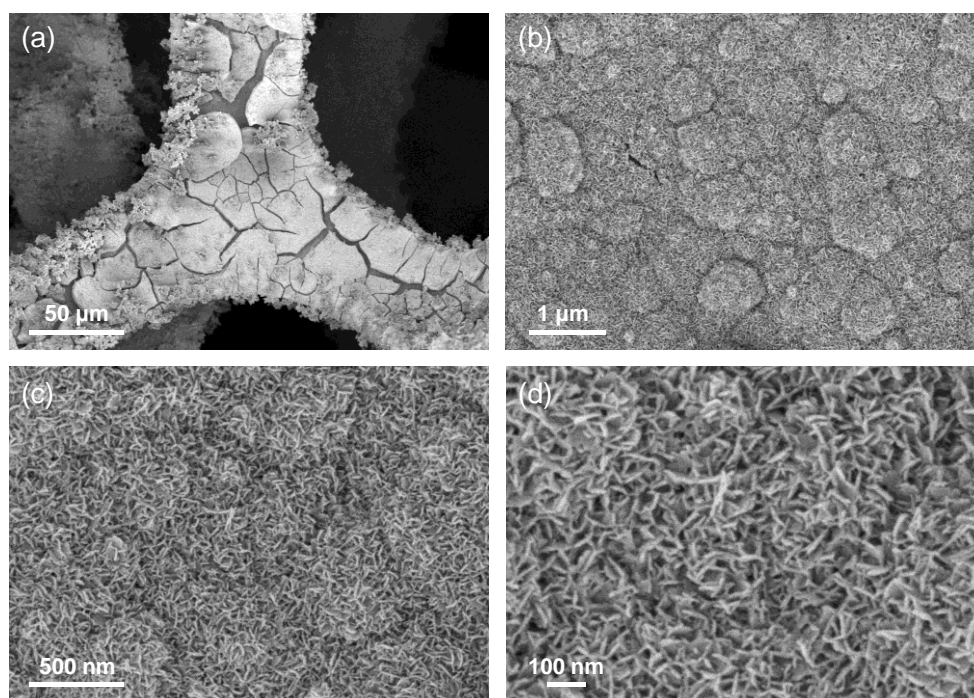

**Fig. S2** (a-d) The SEM images of CoCu at different magnifications.

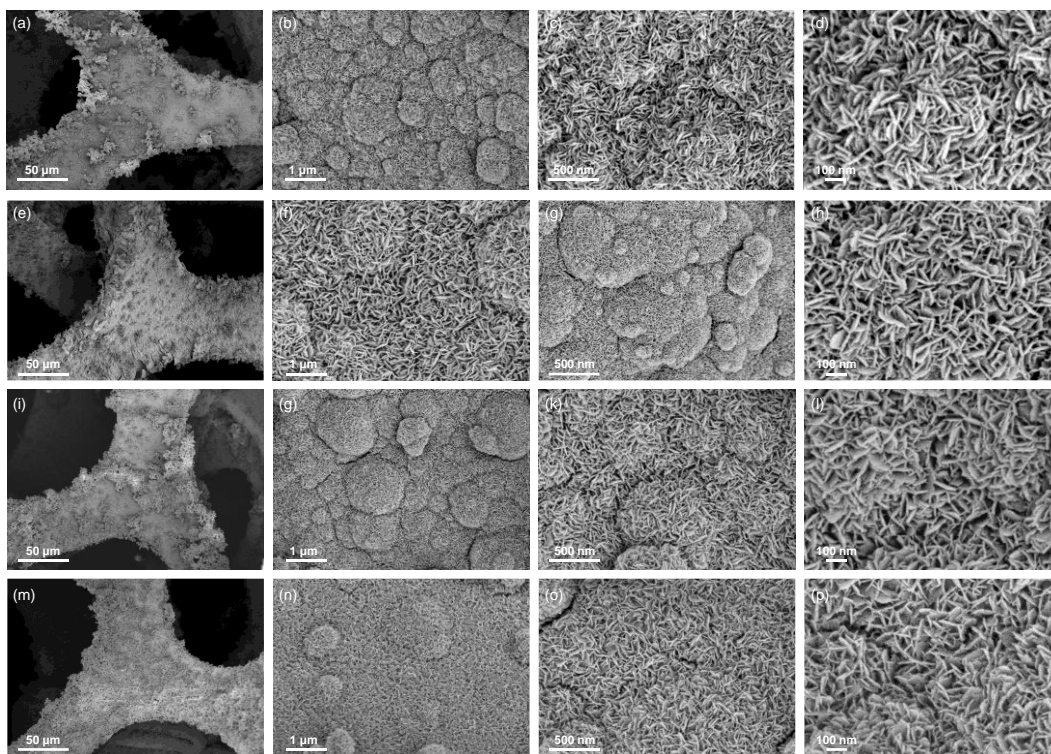

**Fig. S3** (a-d) 2,6-NDA<sub>3</sub>-CoCu , (e-h) 2,6-NDA<sub>5</sub>-CoCu, (i-l) 2,6-NDA<sub>7</sub>-CoCu and (m-p) 2,6-NDA<sub>9</sub>-CoCu at different magnifications.

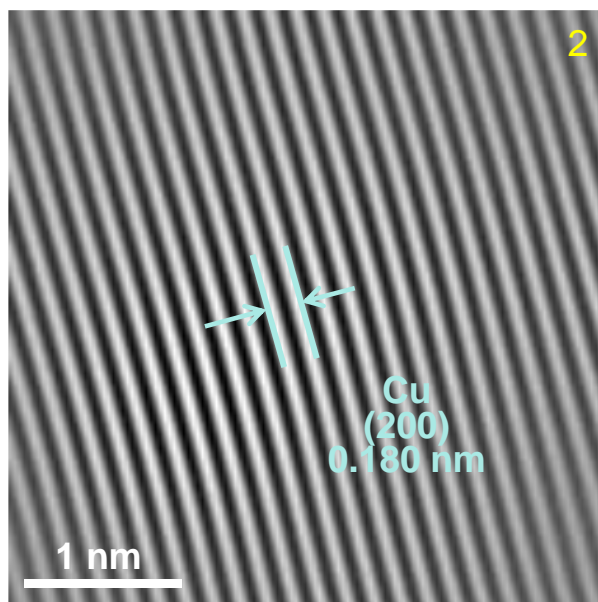

**Fig. S4** The corresponding IFFT filtered image of the region marked by the white square 2.

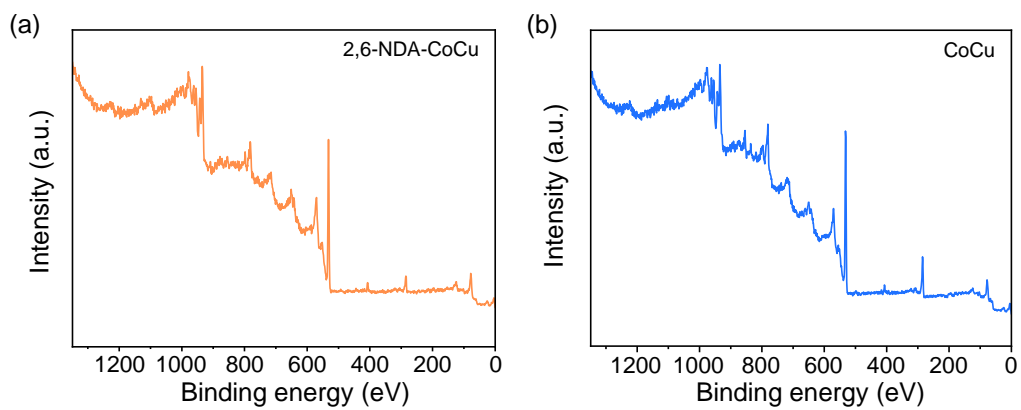

**Fig. S5** The full scan XPS spectra of (a) 2,6-NDA-CoCu and (b) CoCu.

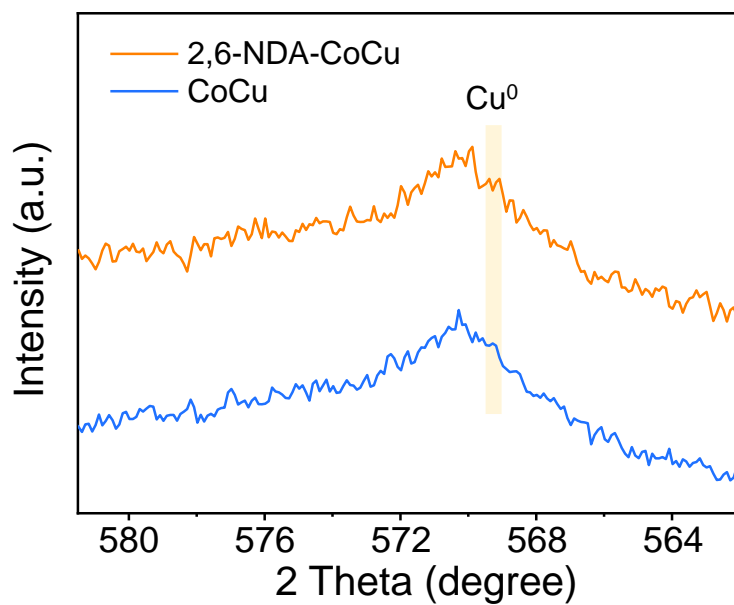

**Fig. S6** Cu LMM Auger spectra of 2,6-NDA-CoCu and CoCu.

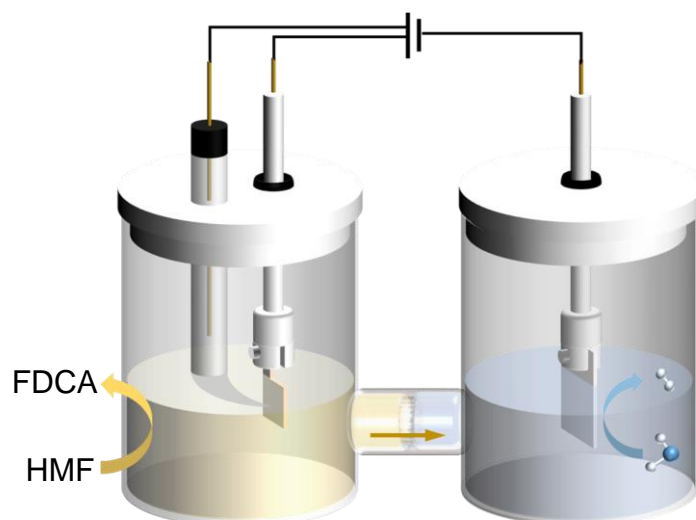

**Fig. S7** Electrochemical system for the electrooxidation of HMF.

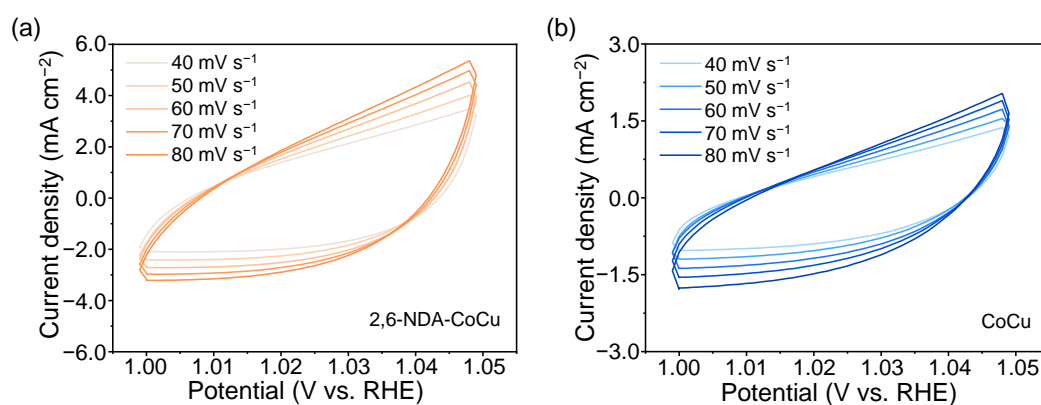

**Fig. S8** The CV curves of (a) 2,6-NDA-CoCu and (b) CoCu 1 mol/L KOH and 50 mmol/L HMF with various scan rates (40/50/60/70/80mV s<sup>-1</sup>).

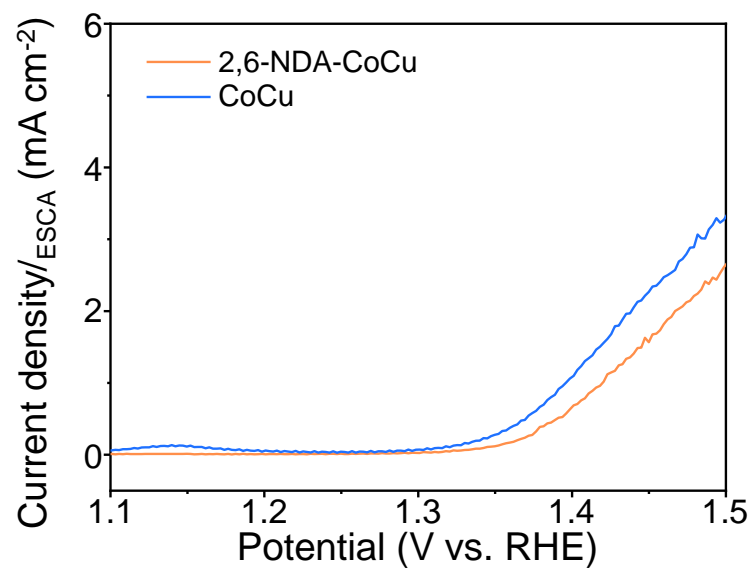

**Fig. S9** ECDSA-normalized LSV curve.

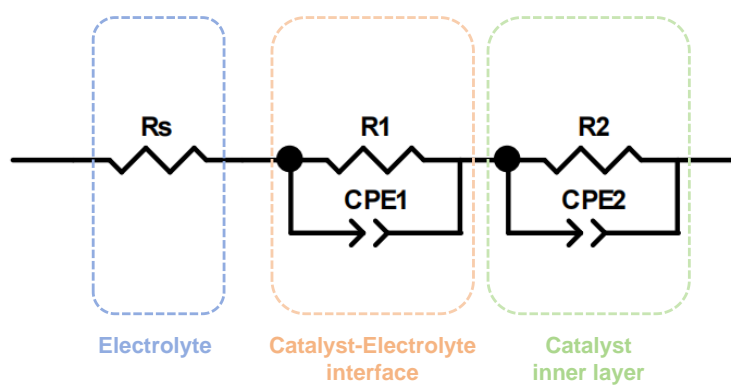

**Fig. S10** Equivalent circuit model containing electrolyte and electrolyte-catalyst.

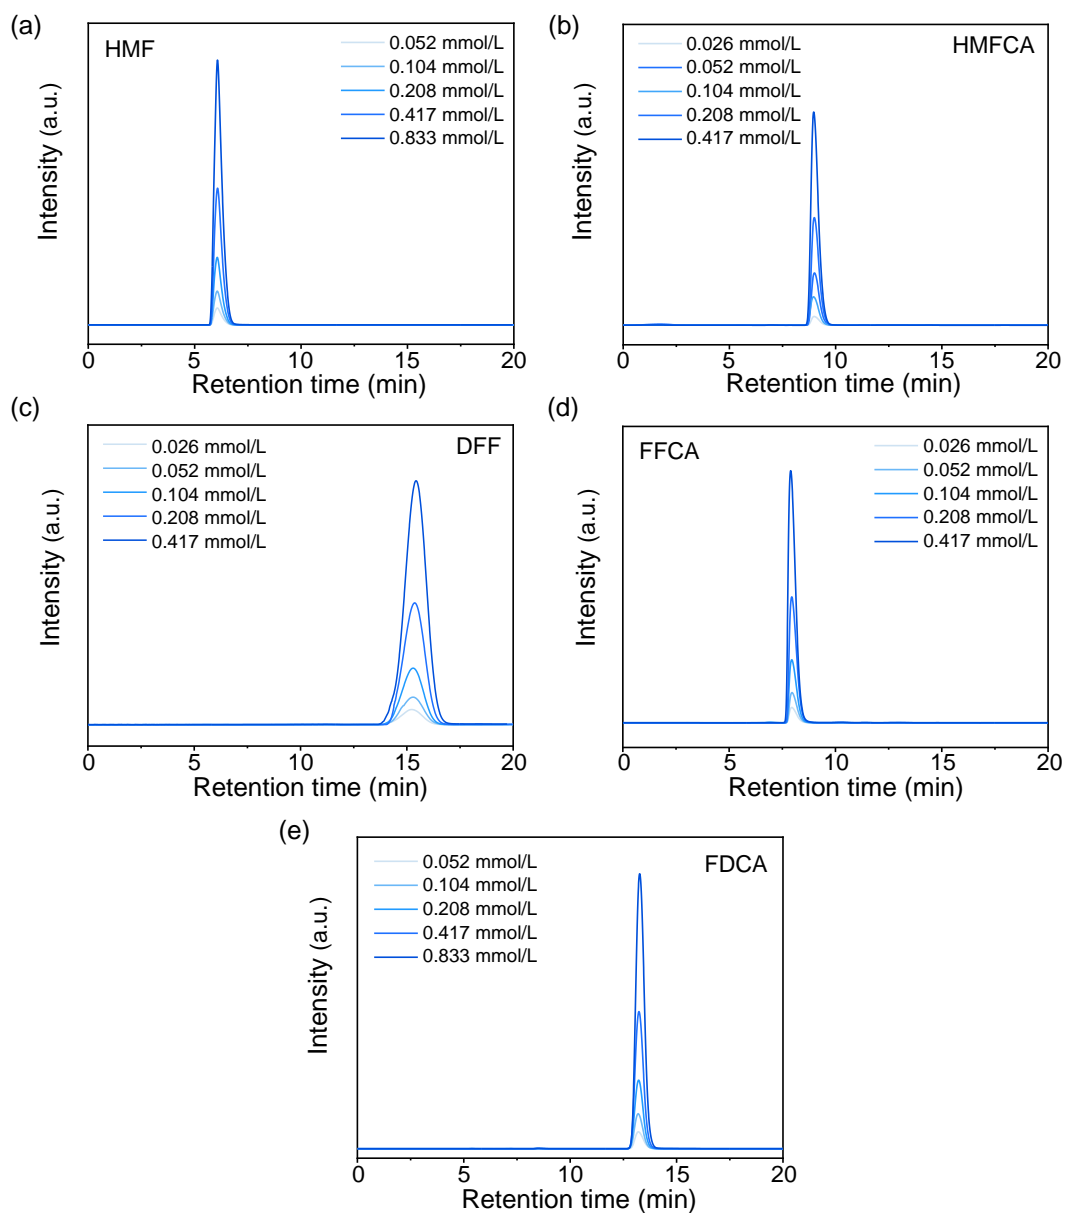

**Fig. S11** The elution curve of related standard mixtures of (a) HMF, (b) HMFCA, (c) DFF, (d) FFCA and (e) FDCA with different concentrations.

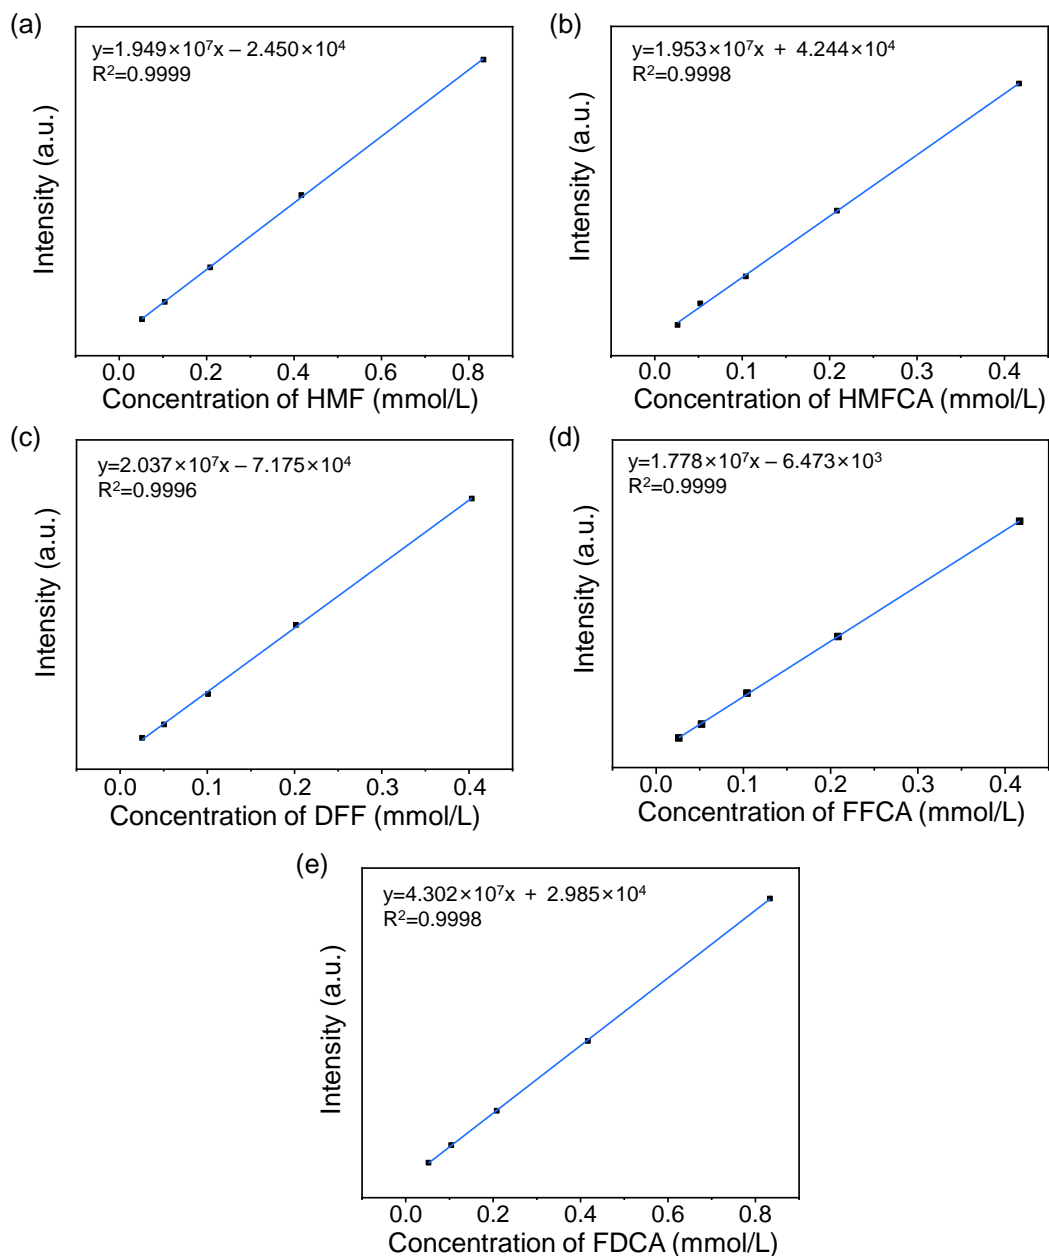

**Fig. S12** HPLC analysis. HPLC chromatograms and corresponding standard curves for (a) HMF, (b) HMFCFA, (c) DFF, (d) FFCA and (e) FDCA with different concentrations.

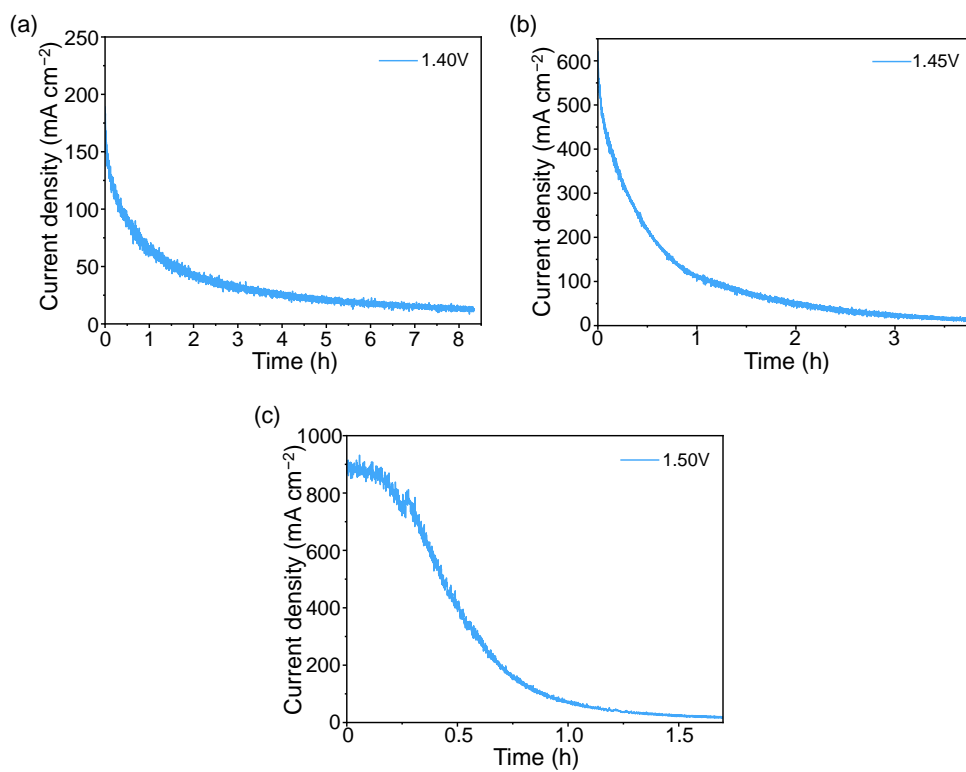

**Fig. S13** Chronoamperometric curves of 2,6-NDA-CoCu at in (a) 1.40 V, (b) 1.45 V and (c) 1.50 V in 1 mol/L KOH with 50 mmol/L HMF.

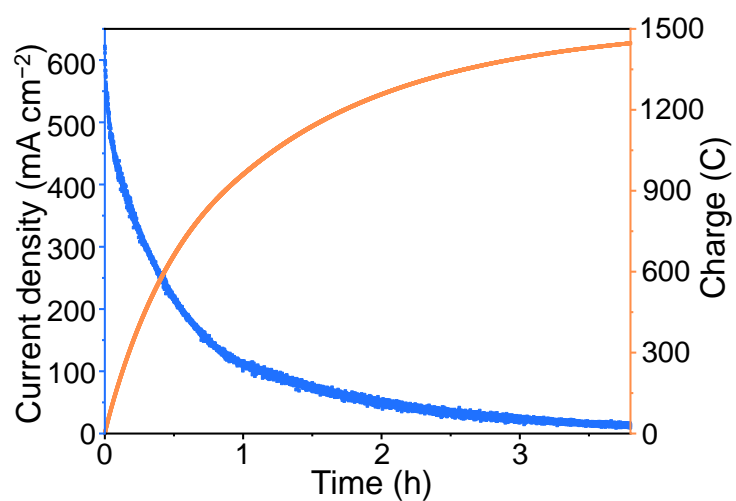

**Fig. S14** Chronoamperometric curves and passed charge of 2,6-NDA-CoCu at 1.45V with 50 mmol/L HMF in 1 mol/L KOH solution.

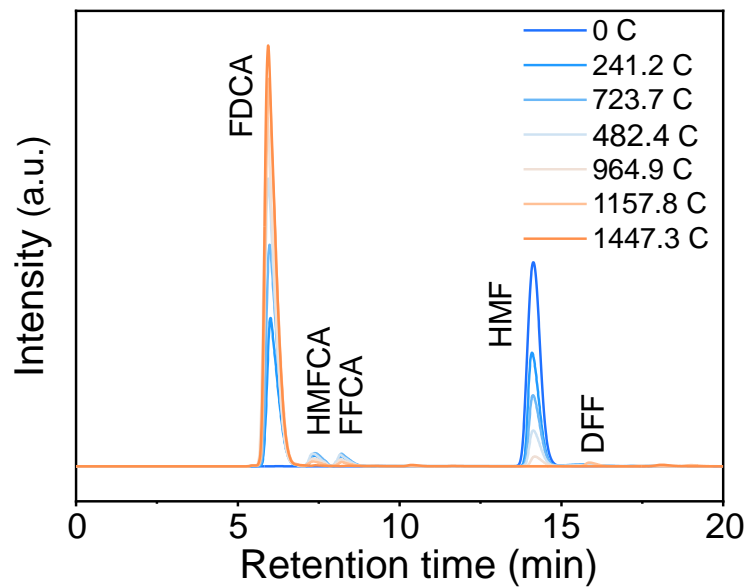

**Fig. S15** HPLC chromatogram of the electrolyte at various electrolysis charges.

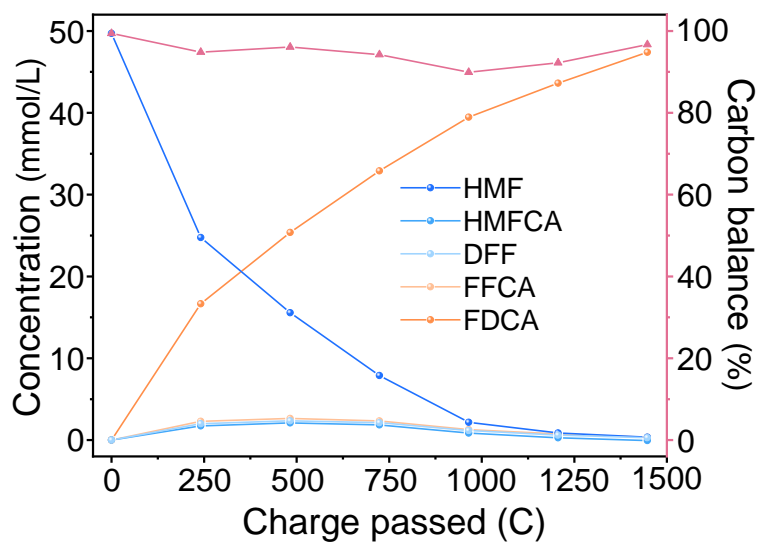

**Fig. S16** Evolution of organic matter concentrations as a function of charge input and the corresponding carbon balance.

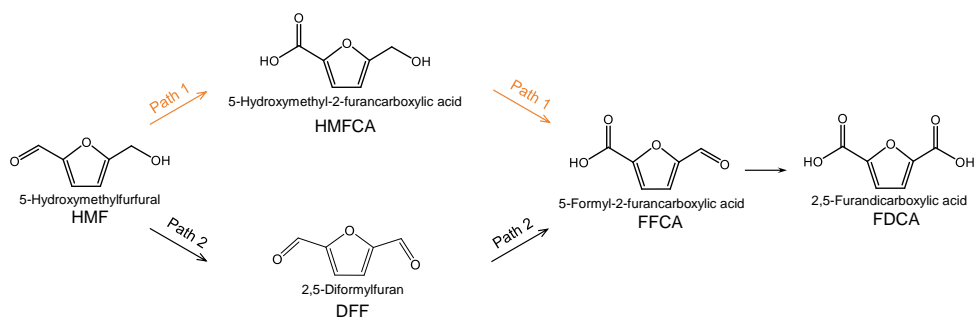

**Fig. S17** Schematic reaction process HMFOR.

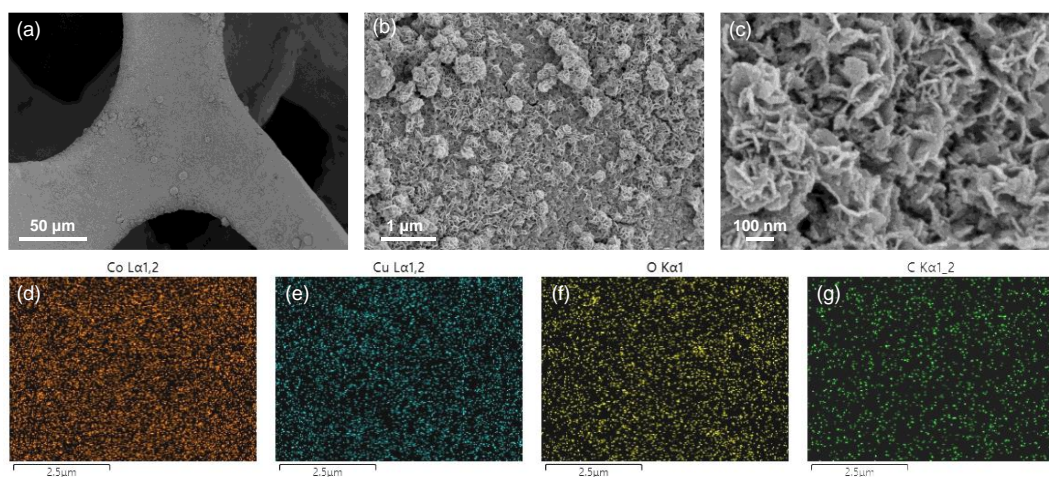

**Fig. S18** (a-c) The SEM images and (d-g) EDS elemental maps of 2,6-NDA-CoCu after 10 consecutive HMFOR cycles at different magnifications.

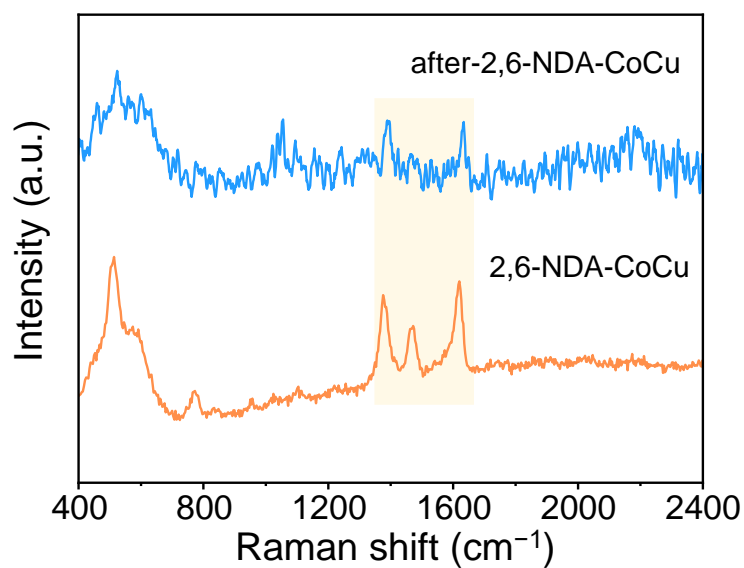

**Fig. S19** Raman spectra of 2,6-NDA-CoCu before and after 10 consecutive electrolysis cycles.

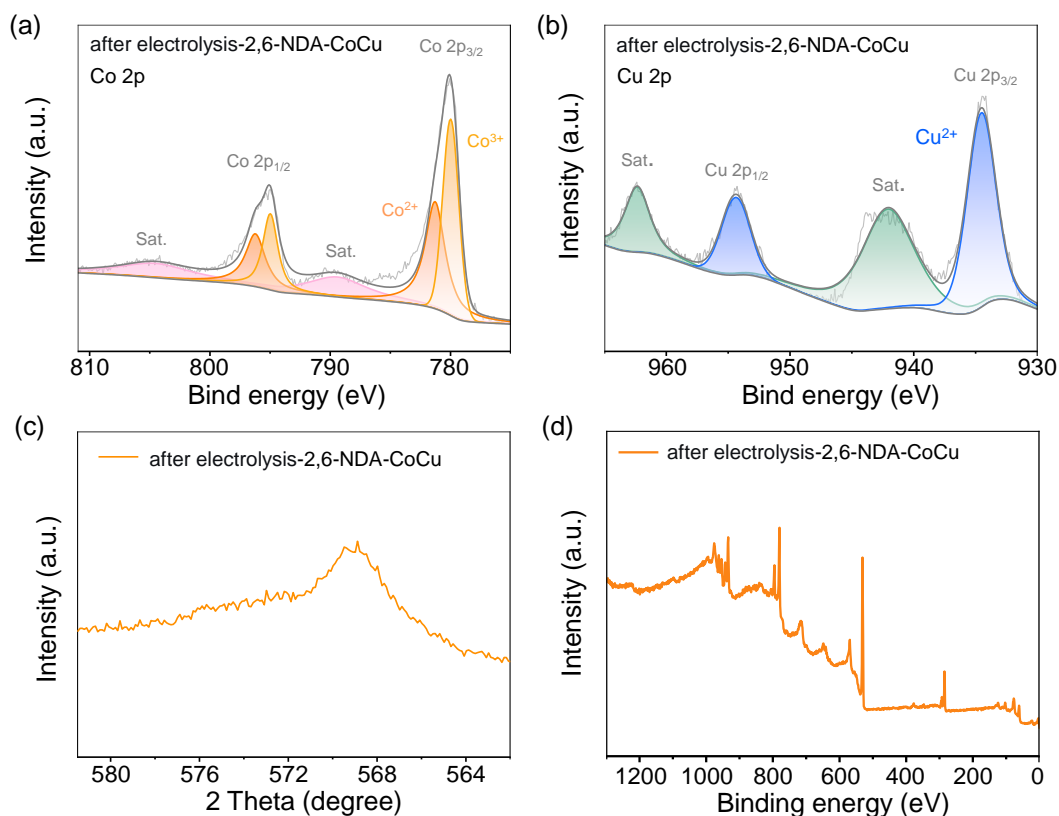

**Fig. 20** XPS characterization of the 2,6-NDA-CoCu electrode after ten electrolysis cycles: (a) high-resolution Co 2p XPS spectrum, (b) high-resolution Cu 2p XPS spectrum, (c) Cu LMM Auger spectrum, and (d) survey XPS spectrum.

Note: The Co 2p XPS spectrum shows that the post-electrolysis sample exhibits characteristic Co  $2p_{3/2}$  peaks for  $\text{Co}^{3+}$  and  $\text{Co}^{2+}$  at 779.98 eV and 781.46 eV, respectively, and Co  $2p_{1/2}$  characteristic peaks for  $\text{Co}^{3+}$  and  $\text{Co}^{2+}$  at 796.25 eV and 804.36 eV, respectively. This confirms that Co exists as a mixed valence state ( $\text{Co}^{2+}/\text{Co}^{3+}$ ) after the reaction, and that high-valence  $\text{Co}^{3+}$  is retained during the reaction. Combined with the electrochemical performance, we identify high-valence  $\text{Co}^{3+}$  as the genuine active site for the HMFOR process.

The Cu 2p XPS spectrum reveals that the characteristic peak of  $\text{Cu}^0$  completely disappears after electrolysis, while new peaks assigned to  $\text{Cu}^{2+}$  appear at 934.55 eV ( $\text{Cu } 2p_{3/2}$ ) and 954.39 eV ( $\text{Cu } 2p_{1/2}$ ). In addition, no clear  $\text{Cu}^0$  signal is observed in the Cu LMM Auger spectrum, indicating that  $\text{Cu}^0$  is completely converted to  $\text{Cu}^{2+}$ . This does not conflict with the presence of  $\text{Cu}^0$  in the as-synthesized pre-catalyst. During

the activation process, the 2,6-NDA-CoCu pre-catalyst undergoes in situ reconstruction under anodic potential to form  $\text{Cu}^{2+}$ .<sup>1,2</sup>

Regarding the role of the activated  $\text{Cu}^{2+}$ , previous studies have shown that in situ generated  $\text{Cu}^{2+}$  species can stabilize high-valence  $\text{Co}^{3+}$  through electronic interactions, and also improve the conductivity of the electrode interface and hydroxyl adsorption capacity.<sup>1,3,4</sup> To further validate the contribution of Cu, we compared the LSV performance of a Cu-free control sample, 2,6-NDA-Co, with that of 2,6-NDA-CoCu (Fig. S21). The results show that 2,6-NDA-CoCu exhibits superior catalytic activity to 2,6-NDA-Co, indicating that even though  $\text{Cu}^0$  is converted to  $\text{Cu}^{2+}$  during the reaction, the presence of Cu remains indispensable for enhancing the overall catalytic performance.

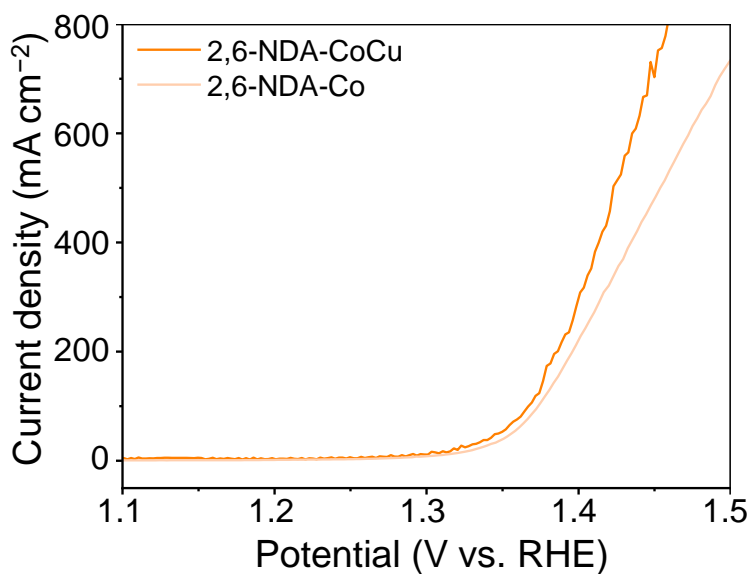

**Fig. S21** Comparison of LSV curves for HMFOR on 2,6-NDA-CoCu and 2,6-NDA-Co.

## 5 References

- 1 P. Zhao, B. Chen, W. Zhao, Z. Chen, L. Guan, Y. Li, W. Peng, J. Zhang, Q. Zhang and X. Fan, *ACS Catal.*, 2025, **15**, 15132–15140.
- 2 G. Tong, K. Zheng, Z. Feng, R. Su, X. Liu, X. Tao, C. Zhang and C. Xu, *Angew. Chem. Int. Ed.*, 2025, **64**, e202512175.
- 3 S. Liu, S. Dou, J. Meng, Y. Liu, Y. Liu and H. Yu, *Appl. Catal. B*, 2023, **331**, 122709.
- 4 X. Tao, G. Tong, C. Zhang, X. Liu, X. Meng, C. Xu and K. Zheng, *Appl. Surf. Sci.*, 2026, **726**, 165915.
